# Supplementary material for: Vibrational autoionization of state-selective jet-cooled methanethiol (CH3SH) investigated with infrared + vacuum-ultraviolet photoionization
Source: Royal Society of Chemistry journal article supplement (doi:10.1039/c7cp06433k), 2017-01-01
Supplement: c7cp06433k1.pdf [file c7cp06433k1.pdf]

Electronic Supplementary Information

**Vibrational autoionization of state-selective jet-cooled methanethiol  
(CH<sub>3</sub>SH) investigated with infrared + vacuum-ultraviolet  
photoionization**

Min Xie,<sup>a</sup> Zhitao Shen,<sup>a</sup> S. T. Pratt<sup>\*b</sup> and Yuan-Pern Lee<sup>\*ac</sup>

<sup>a</sup> *Department of Applied Chemistry and Institute of Molecular Science, National Chiao Tung University, Hsinchu 30010, Taiwan. Email: [yplee@mail.nctu.edu.tw](mailto:yplee@mail.nctu.edu.tw); Tel:+886-3-5131459*

<sup>b</sup> *Argonne National Laboratory, Argonne, Illinois 60439, USA. Email: [stpratt@anl.gov](mailto:stpratt@anl.gov)*

<sup>c</sup> *Institute of Atomic and Molecular Sciences, Academia Sinica, Taipei 10617, Taiwan*

## Table of Contents

**Table S1.** Observed and fitted term values of Rydberg series in Fig. 2(a).

**Table S2.** Selected Franck-Condon factors (FCF) between the normal modes of CH<sub>3</sub>SH and CH<sub>3</sub>SH<sup>+</sup> calculated with the B3LYP/aug-cc-pVDZ method.

**Table S3.** Observed and fitted term values of Rydberg series in Fig 2(b).

**Table S4.** Observed and fitted term values of Rydberg series in Fig. 3.

**Table S5.** Observed and fitted term values of Rydberg series in Fig. 4(a)

**Table S6.** Observed and fitted term values of Rydberg series in Fig. 4(b)

**Figure S1.** Single-photon VUV photoionization efficiency (VUV-PIE) spectrum of CH<sub>3</sub>SH in the range 75600–77600 cm<sup>-1</sup>.

**Figure S2.** First-derivative plots of the PIE curves in Fig. 2.

**Figure S3.** First-derivative plot of the PIE curve in Fig. 3.

**Figure S4.** First-derivative plots of the PIE curves in Fig. 4.

**Table S1.** Observed term values of Rydberg series in Fig. 2(a) and corresponding fitted values according to Eq. (2). The spectrum was obtained by fixing the IR laser at  $2601 \text{ cm}^{-1}$  ( $\nu_3$  mode of  $\text{CH}_3\text{SH}$ ) while scanning the VUV laser. The principal quantum number is  $n$ , the quantum defect is  $\delta$ , and the fitted converging energy is  $\text{IE}_v$

| $n$           | $(ns \leftarrow 3a'')$ |                                 |                             | $(np \leftarrow 3a'')$ |                                 |                             | $(nd \leftarrow 3a'')$ |                                 |                             | $(nf \leftarrow 3a'')$ |                                 |                             |
|---------------|------------------------|---------------------------------|-----------------------------|------------------------|---------------------------------|-----------------------------|------------------------|---------------------------------|-----------------------------|------------------------|---------------------------------|-----------------------------|
|               | Obs.                   | Individual fitting <sup>a</sup> | Global fitting <sup>b</sup> | obs.                   | Individual fitting <sup>a</sup> | Global fitting <sup>b</sup> | obs.                   | Individual fitting <sup>a</sup> | Global fitting <sup>b</sup> | obs.                   | Individual fitting <sup>a</sup> | Global fitting <sup>b</sup> |
| 7             | --                     | 74175                           |                             | --                     | 75106                           |                             | 76302                  | 76303                           | 76301                       | 76545                  | 76548                           | 76545                       |
| 8             | --                     | 75601                           |                             | --                     | 76152                           |                             | 76904                  | 76905                           | 76902                       | 77067                  | 77067                           | 77065                       |
| 9             | 76455                  | 76452                           | 76455                       | 76809                  | 76807                           | 76809                       | 77307                  | 77310                           | 77309                       | 77422                  | 77423                           | 77422                       |
| 10            | 77005                  | 77001                           | 77003                       | 77239                  | 77244                           | 77243                       | 77592                  | 77596                           | 77595                       | 77675                  | 77678                           | 77678                       |
| 11            | 77378                  | 77375                           | 77379                       | 77555                  | 77550                           | 77549                       | 77808                  | 77806                           | 77806                       | 77862                  | 77867                           | 77867                       |
| 12            | 77650                  | 77642                           | 77646                       | 77772                  | 77773                           | 77771                       | 77967                  | 77964                           | 77963                       | 78013                  | 78011                           | 78011                       |
| 13            | 77844                  | 77839                           | 77844                       | 77939                  | 77940                           | 77937                       | 78086                  | 78086                           | 78086                       | 78124                  | 78123                           | 78123                       |
| 14            | 77992                  | 77988                           | 77993                       |                        | 78068                           |                             |                        | 78183                           |                             | 78213                  | 78212                           | 78212                       |
| 15            |                        | 78104                           |                             |                        | 78169                           |                             |                        | 78260                           |                             | 78284                  | 78283                           | 78284                       |
| 16            |                        | 78195                           |                             |                        | 78250                           |                             |                        | 78323                           |                             | 78339                  | 78342                           | 78343                       |
| $\text{IE}_v$ |                        | $78770 \pm 2$                   | $78770 \pm 1$               |                        | $78774 \pm 5$                   | $78770 \pm 1$               |                        | $78770 \pm 2$                   | $78770 \pm 1$               |                        | $78769 \pm 1$                   | $78770 \pm 1$               |
| $\delta$      |                        | $2.11 \pm 0.01$                 | $2.12 \pm 0.01$             |                        | $1.53 \pm 0.01$                 | $1.52 \pm 0.01$             |                        | $0.33 \pm 0.01$                 | $0.33 \pm 0.01$             |                        | $-0.03 \pm 0.01$                | $-0.02 \pm 0.01$            |

<sup>a</sup> Fitted for each individual series. <sup>b</sup> Simultaneous fitting of all series using the same  $\text{IE}_v$ .

**Table S2.** Selected Franck-Condon factors (FCF) between the normal modes of CH<sub>3</sub>SH and CH<sub>3</sub>SH<sup>+</sup> calculated with the B3LYP/aug-cc-pVQZ method. FCF including the Duschinsky effect were calculated using the harmonic approximation with the ezSpectrum v3.0 program

| ionic \ neutral | assignment                    | 0             | $\nu_1$       | $\nu_2$       | $\nu_3$       | $\nu_9$       | $2\nu_4$      | $2\nu_{10}$   |
|-----------------|-------------------------------|---------------|---------------|---------------|---------------|---------------|---------------|---------------|
| 0 <sup>+</sup>  |                               | <b>0.6290</b> | 0.0011        | 0.0028        | 0.0059        | 0.0000        | 0.0009        | 0.0004        |
| $\nu_1^+$       | CH <sub>3</sub> stretch (a')  | 0.0005        | <b>0.5859</b> | 0.0408        | 0.0000        | 0.0000        | 0.0000        | 0.0000        |
| $\nu_2^+$       | CH <sub>3</sub> stretch (a')  | 0.0049        | 0.0386        | <b>0.5793</b> | 0.0001        | 0.0000        | 0.0000        | 0.0000        |
| $\nu_3^+$       | SH stretch (a')               | 0.0062        | 0.0000        | 0.0002        | <b>0.6166</b> | 0.0000        | 0.0000        | 0.0000        |
| $\nu_4^+$       | CH <sub>2</sub> scissor (a')  | 0.0242        | 0.0017        | 0.0005        | 0.0004        | 0.0000        | 0.0163        | 0.0000        |
| $\nu_5^+$       | CH <sub>3</sub> deform (a')   | 0.0104        | 0.0004        | 0.0001        | 0.0001        | 0.0000        | 0.0072        | 0.0000        |
| $\nu_6^+$       | CH <sub>3</sub> rock (a')     | 0.0592        | 0.0005        | 0.0020        | 0.0008        | 0.0000        | 0.0000        | 0.0000        |
| $\nu_7^+$       | SH bend (a')                  | 0.0188        | 0.0000        | 0.0013        | 0.0000        | 0.0000        | 0.0000        | 0.0000        |
| $\nu_8^+$       | CS stretch (a')               | 0.1446        | 0.0001        | 0.0003        | 0.0015        | 0.0000        | 0.0000        | 0.0001        |
| $\nu_9^+$       | CH <sub>2</sub> stretch (a'') | 0.0000        | 0.0000        | 0.0000        | 0.0000        | <b>0.6214</b> | 0.0000        | 0.0000        |
| $\nu_{10}^+$    | CH <sub>3</sub> rock (a'')    | 0.0000        | 0.0000        | 0.0000        | 0.0000        | 0.0007        | 0.0000        | 0.0000        |
| $\nu_{11}^+$    | CH <sub>3</sub> deform (a'')  | 0.0000        | 0.0000        | 0.0000        | 0.0000        | 0.0001        | 0.0000        | 0.0000        |
| $\nu_{12}^+$    | CS torsion (a'')              | 0.0000        | 0.0000        | 0.0000        | 0.0000        | 0.0034        | 0.0000        | 0.0000        |
| $2\nu_4^+$      |                               | 0.0003        | 0.0001        | 0.0000        | 0.0000        | 0.0000        | <b>0.4052</b> | 0.0000        |
| $2\nu_{10}^+$   |                               | 0.0001        | 0.0000        | 0.0000        | 0.0000        | 0.0000        | 0.0000        | <b>0.6036</b> |

<sup>a</sup> $\nu_i$  and  $\nu_i^+$  denote the  $i$ -th vibrational modes of neutral and cationic CH<sub>3</sub>SH, respectively;  $\nu_1$ : symmetric CH<sub>2</sub> stretch,  $\nu_2$ : symmetric CH<sub>3</sub> stretch,  $\nu_3$ : S-H stretch,  $\nu_9$ : antisymmetric CH<sub>2</sub> stretch,  $2\nu_4$ : overtone of CH<sub>2</sub> scissor,  $2\nu_{10}$ : overtone of CH<sub>3</sub> rock; 0 and 0<sup>+</sup> indicate vibrational ground states of neutral and cationic CH<sub>3</sub>SH, respectively.

**Table S3.** Observed term values of Rydberg series in Fig. 2(b) and corresponding fitted values according to Eq. (2). The spectrum was obtained by fixing the IR laser at  $2948 \text{ cm}^{-1}$  ( $\nu_2$  mode of  $\text{CH}_3\text{SH}$ ) while scanning the VUV laser. The principal quantum number is  $n$ , the quantum defect is  $\delta$ , and the fitted converging energy is  $\text{IE}_v$

| $n$           | $(ns \leftarrow 3a'')$ |                                 |                             | $(np \leftarrow 3a'')$ |                                 |                             | $(nd \leftarrow 3a'')$ |                                 |                             |
|---------------|------------------------|---------------------------------|-----------------------------|------------------------|---------------------------------|-----------------------------|------------------------|---------------------------------|-----------------------------|
|               | Obs.                   | Individual fitting <sup>a</sup> | Global fitting <sup>b</sup> | Obs.                   | Individual fitting <sup>a</sup> | Global fitting <sup>b</sup> | Obs.                   | Individual fitting <sup>a</sup> | Global fitting <sup>b</sup> |
| 7             | --                     | 74533                           |                             | --                     | 75419                           |                             | 76662                  | 76657                           | 76659                       |
| 8             | --                     | 75967                           |                             | 76490                  | 76487                           | 76490                       | 77262                  | 77263                           | 77263                       |
| 9             | 76823                  | 76823                           | 76826                       | 77156                  | 77153                           | 77153                       | 77676                  | 77671                           | 77673                       |
| 10            | 77379                  | 77374                           | 77374                       | 77597                  | 77597                           | 77597                       | 77957                  | 77960                           | 77961                       |
| 11            | 77751                  | 77749                           | 77749                       | 77909                  | 77907                           | 77907                       | 78173                  | 78171                           | 78173                       |
| 12            | 78015                  | 78017                           | 78017                       | 78130                  | 78132                           | 78132                       | 78332                  | 78330                           | 78332                       |
| 13            | 78216                  | 78214                           | 78214                       | 78304                  | 78301                           | 78301                       |                        | 78452                           |                             |
| 14            | 78363                  | 78364                           | 78363                       |                        | 78431                           |                             |                        | 78549                           |                             |
| $\text{IE}_v$ |                        | $79141 \pm 2$                   | $79140 \pm 1$               |                        | $79141 \pm 2$                   | $79140 \pm 1$               |                        | $79138 \pm 3$                   | $79140 \pm 1$               |
| $\delta$      |                        | $2.12 \pm 0.01$                 | $2.11 \pm 0.01$             |                        | $1.57 \pm 0.01$                 | $1.56 \pm 0.01$             |                        | $0.35 \pm 0.01$                 | $0.35 \pm 0.01$             |

<sup>a</sup> Fitted for each individual series. <sup>b</sup> Simultaneous fitting of all series using the same  $\text{IE}_v$ .

**Table S4.** Observed term values of Rydberg series in Fig. 3 and corresponding fitted values according to Eq. (2). The spectrum was obtained by fixing the IR laser at  $3014\text{ cm}^{-1}$  (overlapped  $\nu_1$  and  $\nu_9$  modes of  $\text{CH}_3\text{SH}$ ) while scanning the VUV laser. The principal quantum number is  $n$ , the quantum defect is  $\delta$ , and the fitted converging energy is  $\text{IE}_v$ .

| $n$                                                | $(ns \leftarrow 3a'')$ |                                 |                             | $(np \leftarrow 3a'')$ |                                 |                             | $(nd \leftarrow 3a'')$ |                                 |                             |
|----------------------------------------------------|------------------------|---------------------------------|-----------------------------|------------------------|---------------------------------|-----------------------------|------------------------|---------------------------------|-----------------------------|
|                                                    | Obs.                   | Individual fitting <sup>a</sup> | Global fitting <sup>b</sup> | Obs.                   | Individual fitting <sup>a</sup> | Global fitting <sup>b</sup> | Obs.                   | Individual fitting <sup>a</sup> | Global fitting <sup>b</sup> |
| Ionization to $\text{CH}_3\text{SH}^+$ ( $\nu_1$ ) |                        |                                 |                             |                        |                                 |                             |                        |                                 |                             |
| 7                                                  | --                     | 74684                           |                             | --                     | 75580 <sup>c</sup>              |                             | 76811                  | 76811                           | 76813                       |
| 8                                                  | --                     | 76118                           |                             | 76644                  | 76642                           |                             | 77422                  | 77417                           | 77419                       |
| 9                                                  | 76970                  | 76974                           | 76971                       |                        | 77306                           |                             | 77824                  | 77825                           | 77826                       |
| 10                                                 | 77522                  | 77525                           | 77523                       |                        | 77748                           |                             | 78117                  | 78114                           | 78114                       |
| 11                                                 | 77902                  | 77900                           | 77899                       |                        | 78057                           |                             | 78324                  | 78325                           | 78325                       |
| 12                                                 | 78168                  | 78168                           | 78167                       |                        | 78281                           |                             | 78481                  | 78484                           | 78484                       |
| 13                                                 | 78363                  | 78365                           | 78364                       |                        | 78450                           |                             |                        | 78606                           |                             |
| 14                                                 | 78513                  | 78515                           | 78514                       |                        | 78579                           |                             |                        | 78703                           |                             |
| $\text{IE}_v$                                      |                        | $79292 \pm 2$                   | $79291 \pm 1$               |                        | 79288                           |                             |                        | $79292 \pm 2$                   | $79291 \pm 1$               |
| $\delta$                                           |                        | $2.12 \pm 0.01$                 | $2.12 \pm 0.01$             |                        | 1.56                            |                             |                        | $0.35 \pm 0.01$                 | $0.35 \pm 0.01$             |
| Ionization to $\text{CH}_3\text{SH}^+$ ( $\nu_9$ ) |                        |                                 |                             |                        |                                 |                             |                        |                                 |                             |
| 7                                                  | --                     | 74584                           |                             | --                     | 75522                           |                             | 76720                  | 76719                           | 76723                       |
| 8                                                  | --                     | 76018                           |                             | 76569                  | 76568                           | 76566                       | 77328                  | 77323                           | 77325                       |
| 9                                                  | 76876                  | 76874                           | 76876                       | 77222                  | 77222                           | 77223                       | 77735                  | 77730                           | 77730                       |
| 10                                                 | 77426                  | 77425                           | 77426                       | 77655                  | 77659                           | 77660                       | 78012                  | 78017                           | 78017                       |
| 11                                                 | 77802                  | 77800                           | 77801                       | 77964                  | 77965                           | 77967                       | 78228                  | 78227                           | 78227                       |
| 12                                                 | 78067                  | 78068                           | 78068                       | 78193                  | 78188                           | 78190                       | 78387                  | 78386                           | 78385                       |
| 13                                                 | 78267                  | 78265                           | 78265                       |                        | 78355                           |                             |                        | 78508                           |                             |
| 14                                                 | 78415                  | 78415                           | 78415                       |                        | 78483                           |                             |                        | 78605                           |                             |
| $\text{IE}_v$                                      |                        | $79192 \pm 1$                   | $79192 \pm 2$               |                        | $79189 \pm 3$                   | $79192 \pm 2$               |                        | $79193 \pm 3$                   | $79192 \pm 2$               |
| $\delta$                                           |                        | $2.12 \pm 0.01$                 | $2.12 \pm 0.01$             |                        | $1.53 \pm 0.01$                 | $1.56 \pm 0.01$             |                        | $0.34 \pm 0.01$                 | $0.33 \pm 0.01$             |

<sup>a</sup> Fitted for each individual series. <sup>b</sup> Simultaneous fitting of all series using the same  $\text{IE}_v$ . <sup>c</sup> Lines in this series were calculated using  $\text{IE} = 79288\text{ cm}^{-1}$  and  $\delta = 1.56$ .

**Table S5.** Observed term values of Rydberg series in Fig. 4(a) and corresponding fitted values according to Eq. (2). The spectrum was obtained by fixing the IR laser at  $2867\text{ cm}^{-1}$  ( $2\nu_{10}$  mode of  $\text{CH}_3\text{SH}$ ) while scanning the VUV laser. The principal quantum number is  $n$ , the quantum defect is  $\delta$ , and the fitted converging energy is  $\text{IE}_v$ .

| $n$           | $(ns \leftarrow 3a'')$ |                                 |                             | $(np \leftarrow 3a'')$ |                                 |                             | $(nd \leftarrow 3a'')$ |                                 |                             |
|---------------|------------------------|---------------------------------|-----------------------------|------------------------|---------------------------------|-----------------------------|------------------------|---------------------------------|-----------------------------|
|               | Obs.                   | Individual fitting <sup>a</sup> | Global fitting <sup>b</sup> | Obs.                   | Individual fitting <sup>a</sup> | Global fitting <sup>b</sup> | Obs.                   | Individual fitting <sup>a</sup> | Global fitting <sup>b</sup> |
| 7             | --                     | 74387                           |                             | --                     | 75292                           |                             | --                     | 76530                           |                             |
| 8             | --                     | 75821                           |                             | --                     | 76353                           |                             | 77130                  | 77132                           | 77132                       |
| 9             | 76676                  | 76677                           | 76677                       | --                     | 77016                           |                             | 77539                  | 77537                           | 77536                       |
| 10            | 77228                  | 77228                           | 77226                       | 77459                  | 77457                           | 77459                       | 77825                  | 77824                           | 77824                       |
| 11            | 77606                  | 77603                           | 77603                       | 77766                  | 77766                           | 77767                       | 78031                  | 78033                           | 78032                       |
| 12            | 77872                  | 77871                           | 77871                       | 77995                  | 77991                           | 78991                       | 78195                  | 78191                           | 78191                       |
| 13            | 78071                  | 78068                           | 78068                       | 78152                  | 78159                           | 78159                       | 78310                  | 78313                           | 78312                       |
| 14            | 78216                  | 78218                           | 78218                       | 78293                  | 78288                           | 78288                       | 78407                  | 78410                           | 78409                       |
| 15            | 78331                  | 78334                           | 78333                       | 78390                  | 78390                           | 78389                       | 78489                  | 78487                           | 78486                       |
| 16            | 78428                  | 78425                           | 78426                       | 78469                  | 78471                           | 78470                       |                        | 78550                           |                             |
| 17            | 78503                  | 78499                           | 78500                       | 78540                  | 78537                           | 78536                       |                        | 78602                           |                             |
| 18            | 78557                  | 78560                           | 78560                       |                        | 78591                           |                             |                        | 78646                           |                             |
| 19            | 78608                  | 78610                           | 78610                       |                        | 78636                           |                             |                        | 78682                           |                             |
| 20            | 78648                  | 78652                           | 78652                       |                        | 78674                           |                             |                        | 78713                           |                             |
| $\text{IE}_v$ |                        | $78995 \pm 1$                   | $78995 \pm 1$               |                        | $78997 \pm 3$                   | $78995 \pm 1$               |                        | $78997 \pm 2$                   | $78995 \pm 1$               |
| $\delta$      |                        | $2.12 \pm 0.01$                 | $2.12 \pm 0.01$             |                        | $1.56 \pm 0.01$                 | $1.55 \pm 0.01$             |                        | $0.33 \pm 0.01$                 | $0.33 \pm 0.01$             |

<sup>a</sup> Fitted for each individual series. <sup>b</sup> Simultaneous fitting of all series using the same  $\text{IE}_v$ .

**Table S6.** Observed term values of Rydberg series in Fig. 4(b) and corresponding fitted values according to Eq. (2). The spectrum was obtained by fixing the IR laser at  $2892\text{ cm}^{-1}$  ( $2\nu_4$  mode of  $\text{CH}_3\text{SH}$ ) while scanning the VUV laser. The principal quantum number is  $n$ , the quantum defect is  $\delta$ , and the fitted converging energy is  $\text{IE}_v$ .

| $n$           | $(ns \leftarrow 3a'')$ |                                 |                             | $(np \leftarrow 3a'')$ |                                 |                             | $(nd \leftarrow 3a'')$ |                                 |                             |
|---------------|------------------------|---------------------------------|-----------------------------|------------------------|---------------------------------|-----------------------------|------------------------|---------------------------------|-----------------------------|
|               | Obs.                   | Individual fitting <sup>a</sup> | Global fitting <sup>b</sup> | Obs.                   | Individual fitting <sup>a</sup> | Global fitting <sup>b</sup> | Obs.                   | Individual fitting <sup>a</sup> | Global fitting <sup>b</sup> |
| 7             | --                     | 74439                           |                             | --                     | 75390                           |                             | --                     | 76520                           |                             |
| 8             | --                     | 75865                           |                             | --                     | 76426                           |                             | 77144                  | 77143                           | 77143                       |
| 9             | --                     | 76716                           |                             | 77073                  | 77075                           | 77075                       | 77556                  | 77556                           | 77556                       |
| 10            | 77265                  | 77265                           | 77265                       | 77511                  | 77509                           | 77508                       | 77842                  | 77847                           | 77846                       |
| 11            | 77643                  | 77640                           | 77640                       | 77813                  | 77813                           | 77812                       | 78056                  | 78060                           | 78058                       |
| 12            | 77908                  | 77906                           | 77907                       | 78031                  | 78034                           | 78033                       | 78220                  | 78220                           | 78219                       |
| 13            | 78103                  | 78103                           | 78104                       | 78199                  | 78200                           | 78199                       | 78349                  | 78344                           | 78342                       |
| 14            | 78248                  | 78252                           | 78253                       | 78328                  | 78328                           | 78327                       |                        | 78441                           |                             |
| 15            | 78370                  | 78368                           | 78369                       |                        | 78428                           |                             |                        | 78520                           |                             |
| $\text{IE}_v$ |                        | $79028 \pm 3$                   | $79030 \pm 2$               |                        | $79031 \pm 2$                   | $79030 \pm 2$               |                        | $79033 \pm 3$                   | $79030 \pm 2$               |
| $\delta$      |                        | $2.11 \pm 0.01$                 | $2.11 \pm 0.01$             |                        | $1.51 \pm 0.01$                 | $1.51 \pm 0.01$             |                        | $0.38 \pm 0.01$                 | $0.38 \pm 0.01$             |



<sup>a</sup> Fitted for each individual series. <sup>b</sup> Simultaneous fitting of all series using the same  $IE_v$ .

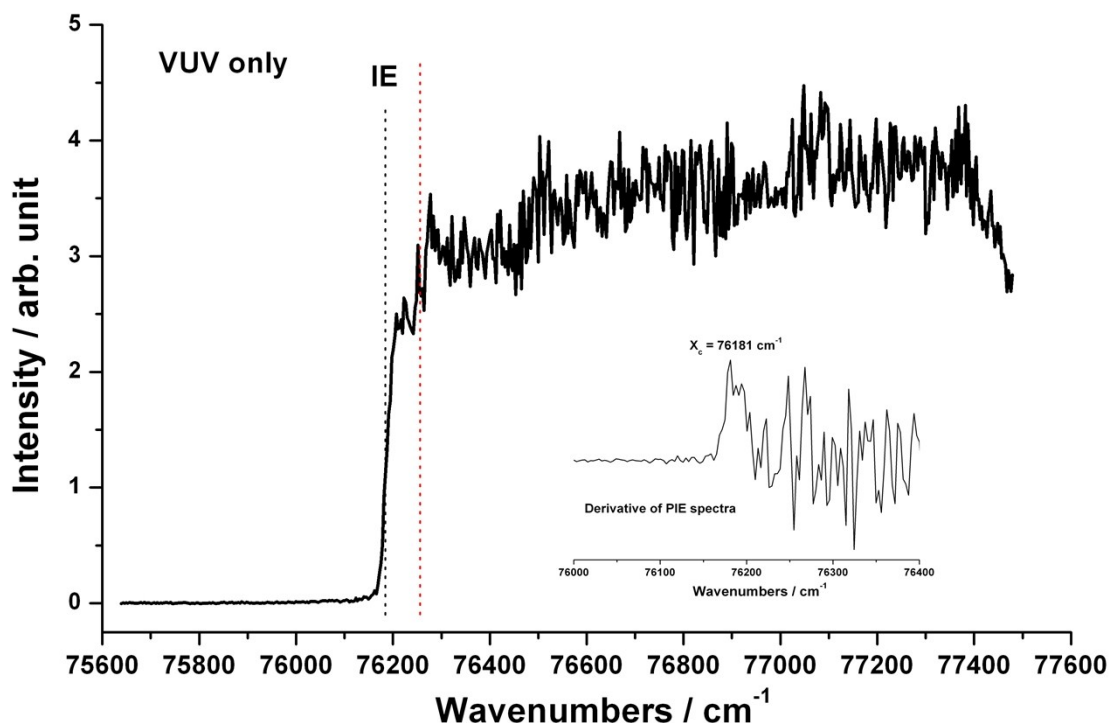

**Fig. S1.** Single-photon VUV photoionization efficiency (VUV-PIE) spectrum of CH<sub>3</sub>SH in the range 75600–77600 cm<sup>-1</sup>. The position marked with the black dotted line (at 76181 cm<sup>-1</sup>) is the maxima of the first-order derivative of the PIE spectrum (shown in the inset). The ionization threshold (IE) of CH<sub>3</sub>SH, 76256.3 ± 2.9 cm<sup>-1</sup>, reported by Cheung *et al.* (J. Chem. Phys. 1998, **109**, 1781) is indicated with a red dotted line. The difference between these two values is due to the shift induced by the electric field. The single step and absence of resonant structure indicates the Franck-Condon factors between the ground state neutral and cation are nearly diagonal, that is, that the potential surfaces of the two states are very similar near their equilibrium geometries.

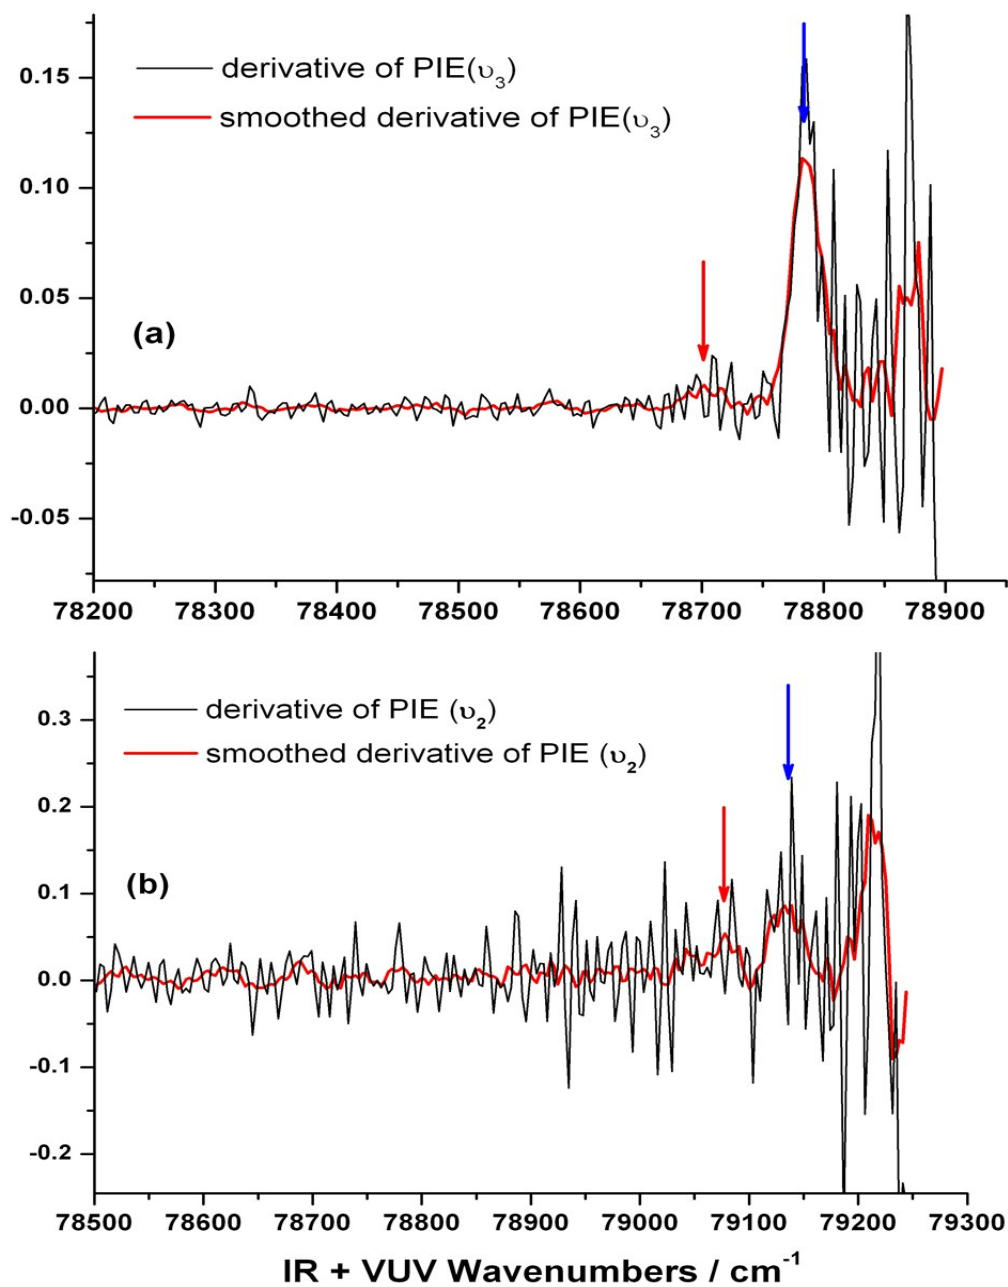

**Fig. S2.** The first-order derivative of the photoionization efficiency (PIE) curves in Fig. 2. The first two maxima, marked with the red and blue arrows, respectively, indicate the step positions.

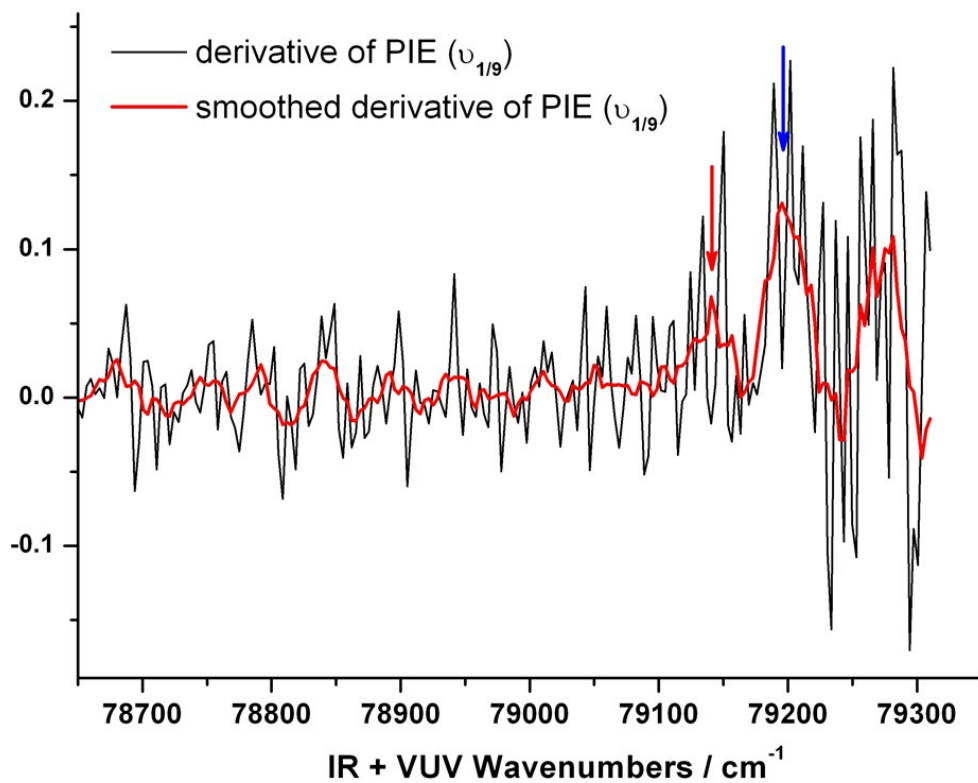

**Fig. S3.** The first-order derivative of the photoionization efficiency (PIE) curves in Fig. 3. The first two maxima, marked with the red and blue arrows, respectively, indicate the step positions.

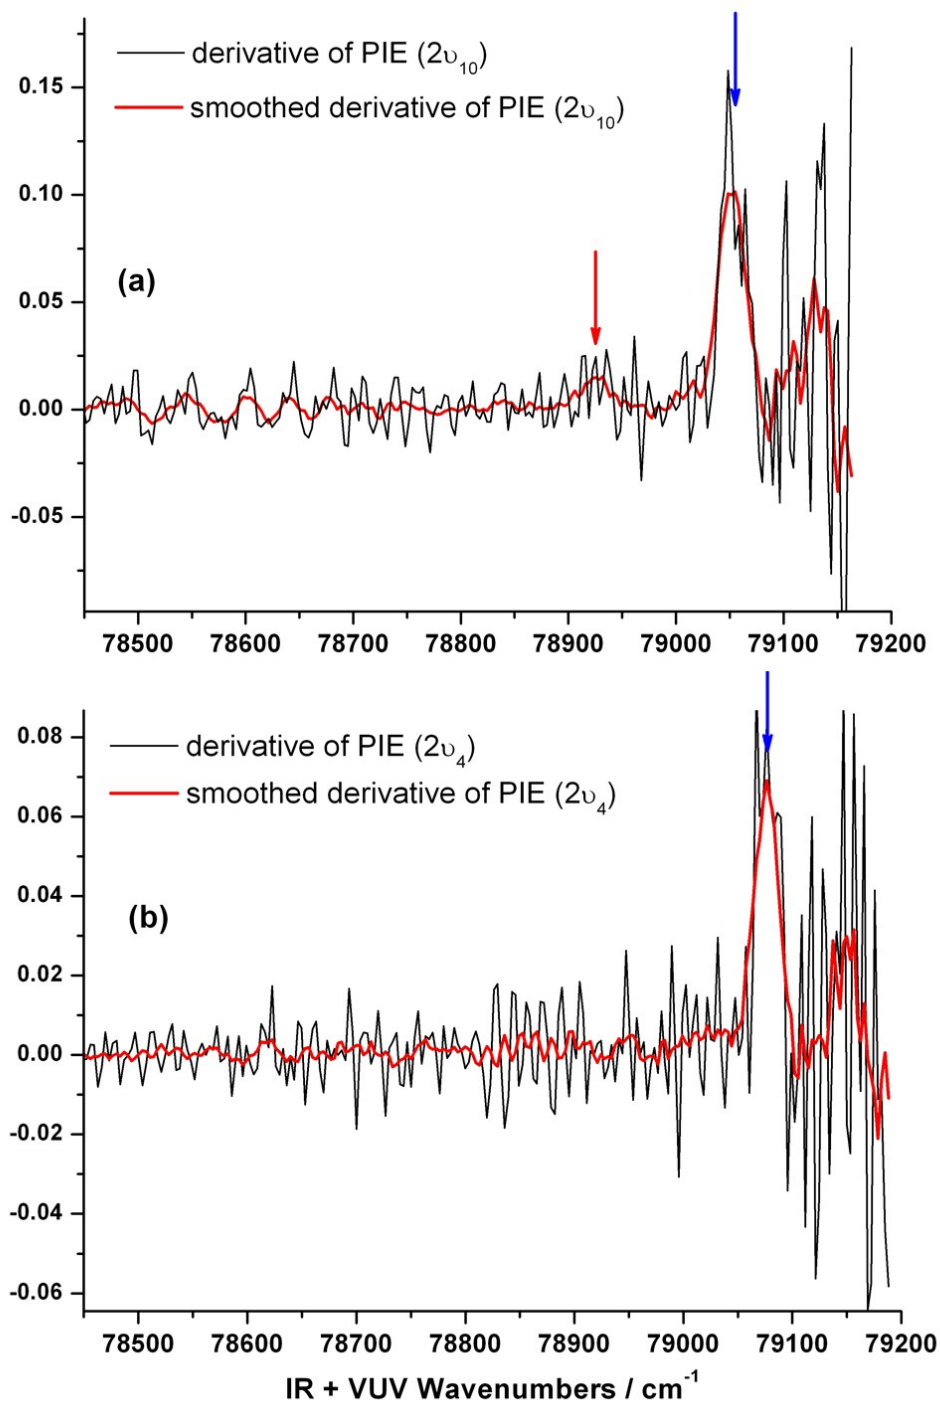

**Fig. S4.** The first-order derivative of the photoionization efficiency (PIE) curves in Fig. 4. The first two maxima, marked with the red and blue arrows, respectively, indicate the step positions. For (b) only one step could be clearly identified.
